# Supplementary material for: Severe Acute Respiratory Syndrome Coronavirus 2 (SARS-CoV-2) Household Transmission during the Omicron Era in Massachusetts: A Prospective, Case-Ascertained Study using Genomic Epidemiology
Source: PubMed Central journal article supplement — medRxiv. 2024 Feb 7:2024.02.05.24302348. Preprint. [Version 2] doi: 10.1101/2024.02.05.24302348 (PMC10871383; doi:10.1101/2024.02.05.24302348), 2024-02-07

431

432 **Supplemental Figure 1. Additional viral load curves and transmission plots by household in**

433 **the primary analysis set.** Households are shown where either a shared exposure exists or

434 possible transmission has occurred, as all cases are genetically linked to the index case.

435 Households are shown where two separate infection clusters were identified.

436

437

## SUPPLEMENTAL TABLES

**Supplemental Table 1. Additional Baseline Data**

| <b>Characteristic</b>                                            | <b>All Participants<br/>(N=99)</b> | <b>Index Cases<br/>(N=33)</b> | <b>Contacts<br/>(N=66)</b> |
|------------------------------------------------------------------|------------------------------------|-------------------------------|----------------------------|
| <b>Currently Working / Employment (N, %) – <i>missing 13</i></b> |                                    |                               |                            |
| Yes                                                              | 57 (66.3)                          | 18 (69.2)                     | 39 (65.0)                  |
| No                                                               | 29 (33.7)                          | 8 (30.8)                      | 21 (35.0)                  |
| Missing                                                          | 13                                 | 7                             | 6                          |
| <b>Student (N, %) – <i>missing 9</i></b>                         |                                    |                               |                            |
| Yes                                                              | 32 (35.6)                          | 13 (43.3)                     | 19 (31.7)                  |
| No                                                               | 58 (64.4)                          | 17 (56.7)                     | 41 (68.3)                  |
| Missing                                                          | 9                                  | 3                             | 6                          |
| <b>If yes (N=32), level (N, %)</b>                               |                                    |                               |                            |
| Elementary                                                       | 11 (34.4)                          | 5 (38.5)                      | 6 (31.6)                   |
| Middle School                                                    | 12 (37.5)                          | 5 (38.5)                      | 7 (36.8)                   |
| High School                                                      | 5 (15.6)                           | 2 (15.4)                      | 3 (15.8)                   |
| Community College                                                | 0                                  | 0                             | 0                          |
| College or University                                            | 4 (12.5)                           | 1 (7.7)                       | 3 (15.8)                   |
| <b>Currently Uses eCigarettes/Vape (N, %) – <i>missing 9</i></b> | 1 (1.1)                            | 0                             | 1 (1.6)                    |
| <b>Currently Smokes Cigarettes (N, %) – <i>missing 9</i></b>     | 1 (1.1)                            | 0                             | 1 (1.6)                    |

|                                                                                         |           |           |           |
|-----------------------------------------------------------------------------------------|-----------|-----------|-----------|
| <b>History of Smoking Cigarettes (N, %) – missing 10</b>                                | 11 (12.4) | 3 (10.3)  | 8 (13.3)  |
| If yes, packs per day (N, %)                                                            |           |           |           |
| 0.5                                                                                     | 7 (63.6)  | 1 (33.3)  | 6 (75.0)  |
| 1.0                                                                                     | 4 (36.4)  | 2 (66.7)  | 2 (25.0)  |
| 1.5                                                                                     | 0         | 0         | 0         |
| 2.0                                                                                     | 0         | 0         | 0         |
| 2.5                                                                                     | 0         | 0         | 0         |
| 3 or more                                                                               | 0         | 0         | 0         |
| If yes, how many years (N, %)                                                           |           |           |           |
| 1-5                                                                                     | 8 (72.7)  | 2 (66.7)  | 6 (75.0)  |
| 5-10                                                                                    | 0         | 0         | 0         |
| 10-15                                                                                   | 1 (9.1)   | 0         | 1 (12.5)  |
| 15-20                                                                                   | 0         | 0         | 0         |
| 20 or more                                                                              | 2 (18.2)  | 1 (33.3)  | 1 (12.5)  |
| <b>Concurrent Use of Steroids or Immune Suppressing Medications (N, %) – missing 12</b> | 6 (6.9)   | 1 (3.6)   | 5 (8.5)   |
| <b>Concurrent use of NSAIDs – missing 13</b>                                            | 38 (44.2) | 10 (37.0) | 28 (47.5) |

**Supplemental Table 2. Baseline Characteristics of Study Households in Primary Analysis Set**

| <b>Characteristic</b>                                              | <b>Total Households (N=33)</b> |
|--------------------------------------------------------------------|--------------------------------|
| Number of persons in household (Median, Min-Max)                   | 3.5 (2-5)                      |
| House size (in square feet) as reported by index (Median, Min-Max) | 1400 (740-3300)                |
| Missing or unknown data from 11 households                         |                                |

**Supplemental Table 3. SARS-CoV-2 Viral Kinetics in Primary Analysis Set, Excluding 2 Cases of Outside Introduction**

| <b>Outcome</b>                                              | <b>Index Cases<br/>(N=30)<sup>a</sup></b> | <b>Infected Contacts<br/>(N=26)</b> |
|-------------------------------------------------------------|-------------------------------------------|-------------------------------------|
| Lowest Ct (median, min-max)                                 | 25.65 (15.9-35)                           | 23 (8.1-36.2)                       |
| Duration of viral shedding <sup>b</sup> (median, min-max)   | 6.5 days (1-19)                           | 8 days (1-20)                       |
| Time to first positive SARS-CoV-2 from index diagnosis date | N/A                                       | 3 days (0-10)                       |

a. Excluding 3 index cases who were PCR negative at baseline.

b. From first positive SARS-CoV-2 test.

**Supplemental Table 4. Sequencing Performance**

| <b>Household</b> | <b>Participant</b> | <b>Samples</b> | <b>Samples Producing Genome with Minimum Unambiguous Genome Length of 15 kbp</b> |
|------------------|--------------------|----------------|----------------------------------------------------------------------------------|
| AXB              | 1                  | 1              | 0                                                                                |
|                  | 2                  | 6              | 5                                                                                |
| JRP              | 1                  | 5              | 5                                                                                |
|                  | 2                  | 6              | 6                                                                                |
| ODK              | 1                  | 1              | 1                                                                                |
| EGI              | 1                  | 6              | 6                                                                                |
|                  | 4                  | 5              | 4                                                                                |
| CWA              | 1                  | 4              | 3                                                                                |
|                  | 2                  | 4              | 3                                                                                |
| VBL              | 1                  | 1              | 1                                                                                |
| TSE              | 1                  | 1              | 1                                                                                |
|                  | 2                  | 6              | 5                                                                                |
| KQX              | 1                  | 1              | 1                                                                                |
| DUC              | 1                  | 2              | 1                                                                                |
|                  | 2                  | 8              | 7                                                                                |
| MPO              | 2                  | 5              | 4                                                                                |
|                  | 3                  | 9              | 7                                                                                |
|                  | 4                  | 4              | 3                                                                                |
| HXJ              | 1                  | 4              | 1                                                                                |
|                  | 3                  | 5              | 5                                                                                |
| BQE              | 1                  | 7              | 5                                                                                |
|                  | 2                  | 5              | 5                                                                                |
| SVW              | 1                  | 1              | 1                                                                                |

|     |   |    |   |
|-----|---|----|---|
| IRG | 1 | 2  | 2 |
|     | 2 | 6  | 6 |
|     | 3 | 4  | 3 |
|     | 4 | 8  | 5 |
| LCT | 1 | 7  | 5 |
|     | 4 | 11 | 9 |
|     | 5 | 9  | 9 |
| PFK | 1 | 1  | 1 |
|     | 4 | 2  | 1 |
| JDU | 1 | 1  | 1 |
| XOA | 1 | 6  | 1 |
|     | 2 | 4  | 4 |
| REZ | 1 | 1  | 0 |
| WMD | 1 | 2  | 1 |
|     | 3 | 4  | 3 |
| HSA | 1 | 1  | 1 |
|     | 2 | 5  | 3 |
| YVB | 1 | 1  | 0 |
| NKF | 1 | 1  | 1 |
|     | 2 | 1  | 0 |
| QEC | 1 | 1  | 1 |
| OXS | 1 | 2  | 2 |
|     | 2 | 1  | 1 |
|     | 4 | 2  | 2 |
| LME | 1 | 1  | 1 |



**Supplemental Table 5. Household Transmission Analysis**

| Household | Transmission Direction | SNV Distance | Difference in Dates of Diagnosis (Days) | iSNV Information                                                                                                 | Transmission Pair Categorization | Household Transmission Categorization |
|-----------|------------------------|--------------|-----------------------------------------|------------------------------------------------------------------------------------------------------------------|----------------------------------|---------------------------------------|
| JRP       | 1>2                    | 1            | 4                                       |                                                                                                                  | Highly probable                  | Highly probable                       |
| EGI       | 1>4                    | 1            | 4                                       |                                                                                                                  | Highly probable                  | Highly probable                       |
| CWA       | 1>2                    | 0            | 2                                       | C21721T; T22917A; C23673T present at mixed sites in 1 (possible BA.2.12.1 & BA.2.10 co-infection) and fixed in 2 | Possible                         | Possible                              |
|           | 2>1                    | 0            | -2                                      |                                                                                                                  | Possible                         |                                       |
| TSE       | 1>2                    | 3            | 5                                       |                                                                                                                  | Unlikely                         | Unlikely                              |
|           | 2>1                    | 3            | -5                                      |                                                                                                                  | Unlikely                         |                                       |
| DUC       | 1>2                    | 0            | 2                                       |                                                                                                                  | Possible                         | Possible                              |
|           | 2>1                    | 0            | -2                                      |                                                                                                                  | Possible                         |                                       |
| MPO       | 4>2                    | 0            | 3                                       |                                                                                                                  | Possible                         | Possible                              |
|           | 4>3                    | 0            | 6                                       |                                                                                                                  | Possible                         |                                       |
|           | 2>4                    | 0            | -3                                      |                                                                                                                  | Possible                         |                                       |
|           | 2>3                    | 0            | 3                                       |                                                                                                                  | Possible                         |                                       |
| HXJ       | 1>3                    | 0            | 1                                       | share C23393T at < 10% frequency                                                                                 | Possible                         | Possible                              |
|           | 3>1                    | 0            | -1                                      |                                                                                                                  | Possible                         |                                       |
| BQE       | 2>1                    | 0            | 2                                       |                                                                                                                  | Possible                         | Possible                              |
|           | 1>2                    | 0            | -2                                      |                                                                                                                  | Possible                         |                                       |
| IRG       | 1>4                    | 3            | 2                                       |                                                                                                                  | Unlikely                         | Mixed household                       |
|           | 4>1                    | 3            | -2                                      |                                                                                                                  | Unlikely                         |                                       |
|           | 4>2                    | 0            | 3                                       |                                                                                                                  | Possible                         |                                       |
|           | 4>3                    | 0            | 5                                       |                                                                                                                  | Possible                         |                                       |
|           | 2>3                    | 0            | 2                                       |                                                                                                                  | Possible                         |                                       |
| LCT       | 4>1                    | 4            | 1                                       |                                                                                                                  | Unlikely                         | Mixed household                       |

# SUPPLEMENTAL FIGURE 1

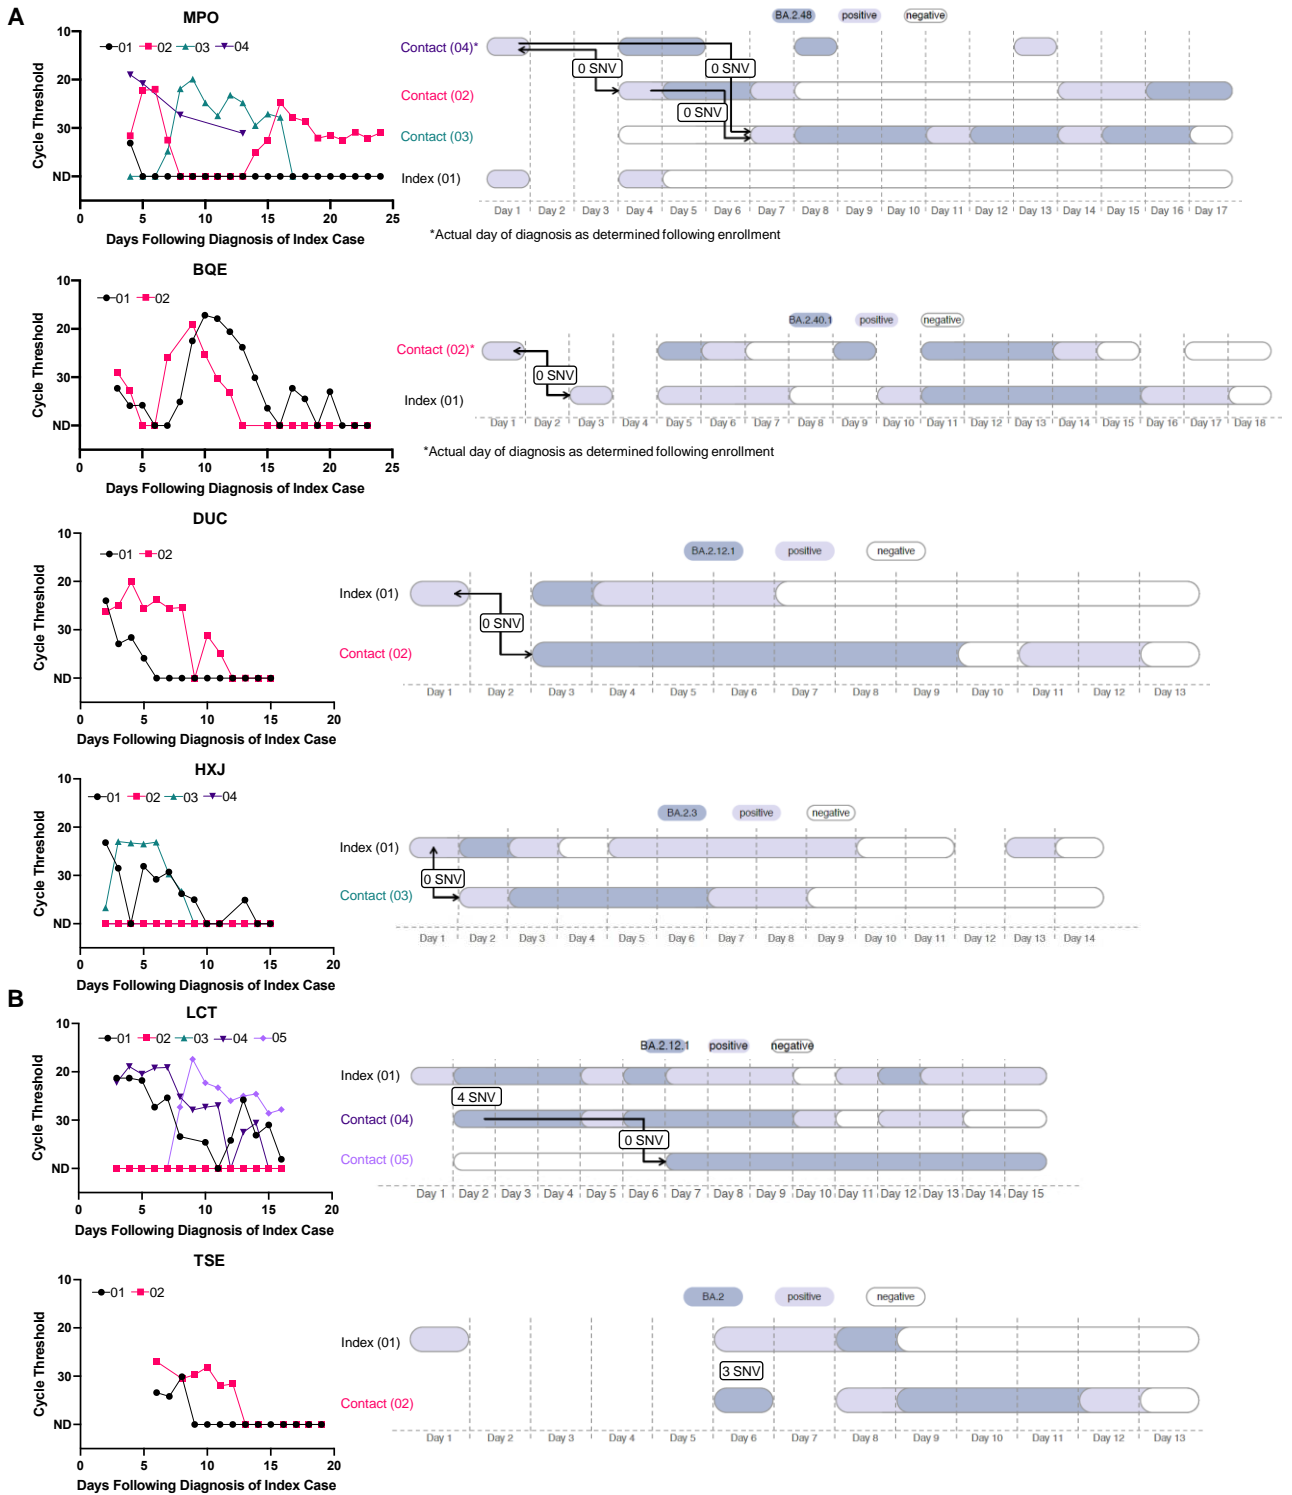

Supplement: NIHPP2024.02.05.24302348v2-supplement-1.pdf [file NIHPP2024.02.05.24302348v2-supplement-1.pdf]
